# Supplementary material for: Calcium carbonate crystal growth beneath Langmuir monolayers of acidic β-hairpin peptides
Source: Royal Society of Chemistry journal article supplement (doi:10.1039/c4dt01154f), 2014-01-01
Supplement: c4dt01154f1.pdf [file c4dt01154f1.pdf]

**Supporting Information for**

**Calcium Carbonate Crystal Growth Beneath Langmuir Monolayers of Acidic  
 $\beta$ -Hairpin Peptides**

*Haofei Gong,<sup>a</sup> Yi Yang,<sup>b</sup> Manuela Plunke,<sup>c</sup> Othmar Marti,<sup>c</sup> Zsuzsa Majer,<sup>d</sup> Norbert  
Sewald<sup>b</sup> and Dirk Volkmer<sup>a\*</sup>*

<sup>a</sup>Institute of Physics, Chair of Solid State and Materials Chemistry, Augsburg University,  
Universitätsstrasse 1, D-86159 Augsburg, Germany

<sup>b</sup>Department of Chemistry, Organic and Bioorganic Chemistry, Bielefeld University,  
PO Box 100131, D-33501 Bielefeld, Germany

<sup>c</sup>Institute of Experimental Physics, Ulm University,  
Albert-Einstein-Allee 11, D-89081 Ulm, Germany

<sup>d</sup>Institute of Chemistry, Eötvös Loránd University,  
PO Box 32, H-1518 Budapest 112, Hungary

*\*Author for correspondence:* dirk.volkmer@physik.uni-augsburg.de

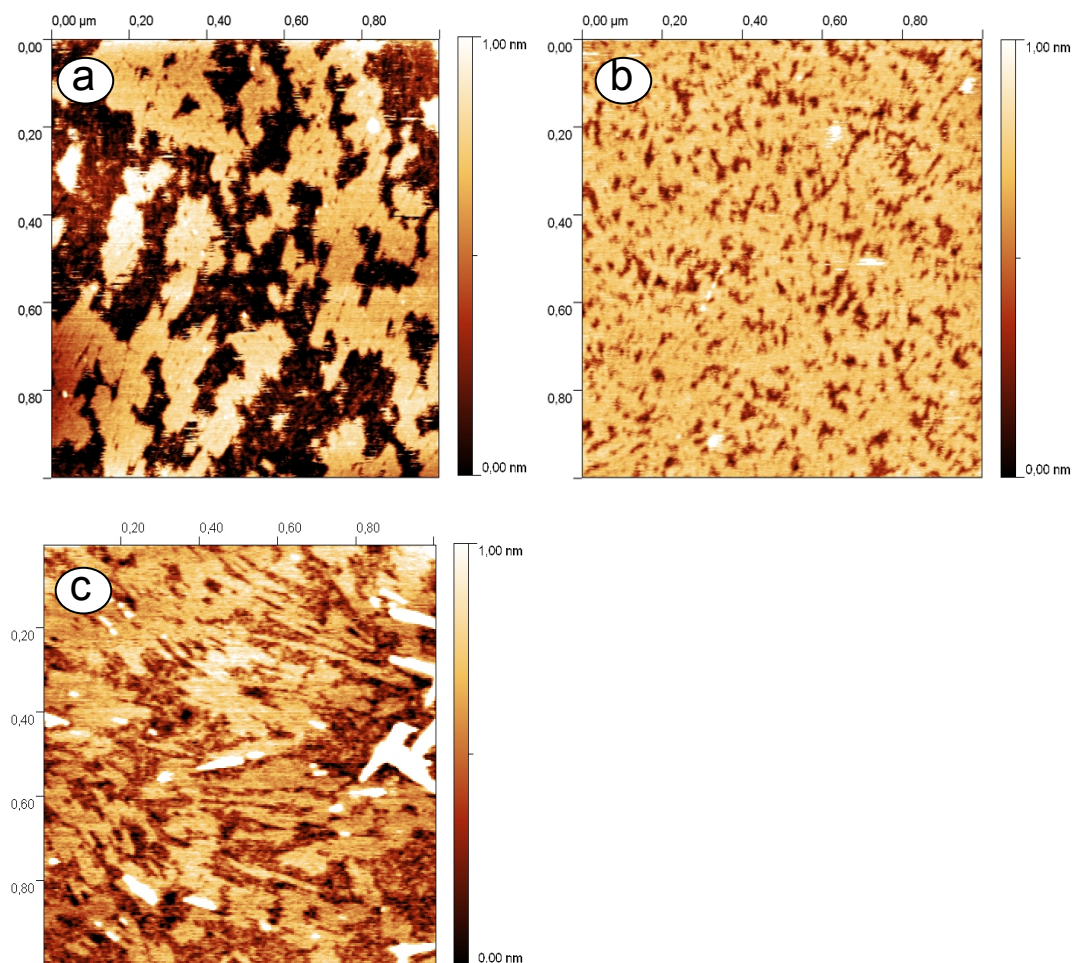

**Figure S1.** AFM topographies of Langmuir-Blodgett films of peptide monolayer transferred from water subphase. (a) peptide **1a**. (b) peptide **2a**. (c) peptide **2b**.

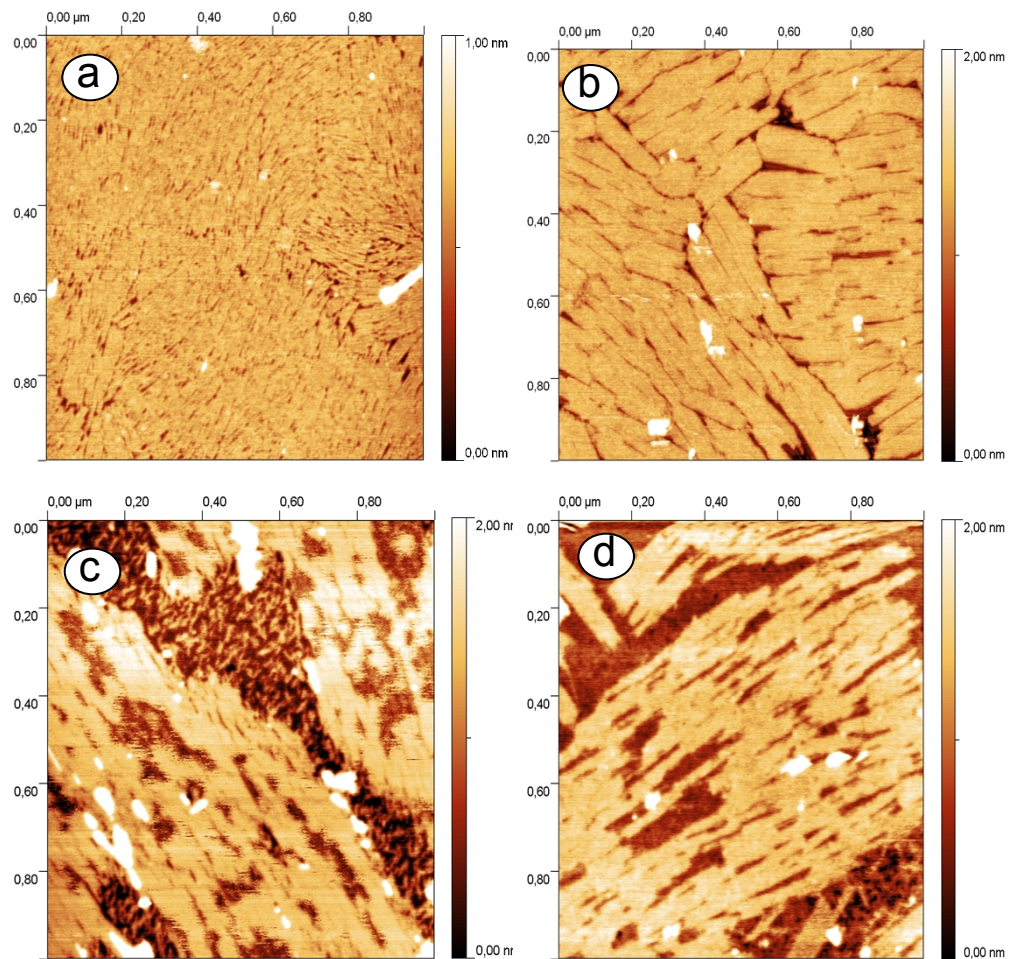

**Figure S2.** AFM topographies of Langmuir-Blodgett films of peptide **1b** transferred from water subphase (a), 0.01M CaCl<sub>2</sub> subphase (b), 0.01 M calcium acetate subphase (c), and 0.01 M HCl subphase (d).

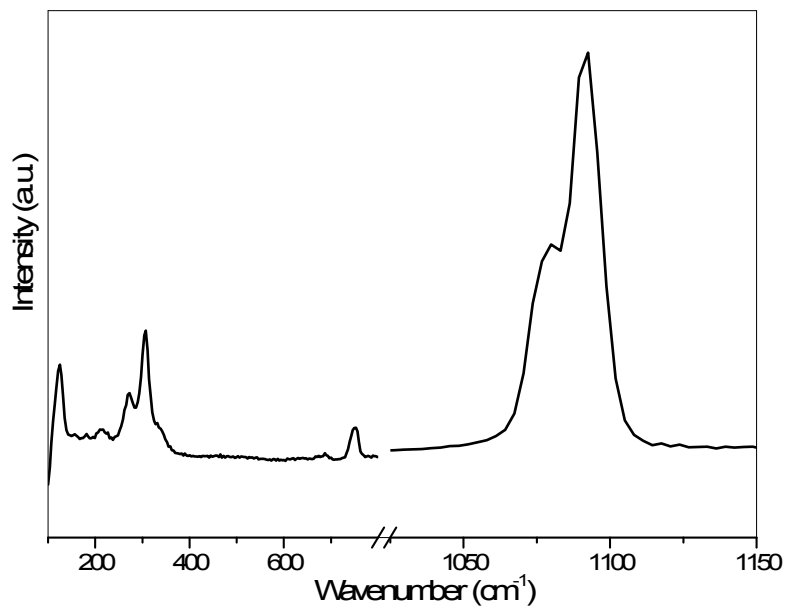

**Figure S3.** Raman spectrum of crystals growth under monolayer of peptide **1a** after 1 hour.

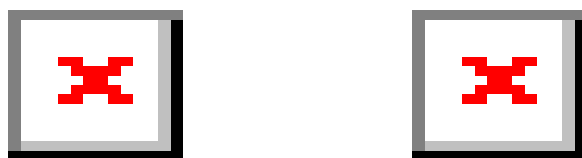

**Figure S4.** BAM images of  $\text{CaCO}_3$  crystallization beneath peptide **1a** for 1 hour. Left, crystallization at 0.1 mN/m. Right, crystallization at 15 mN/m.

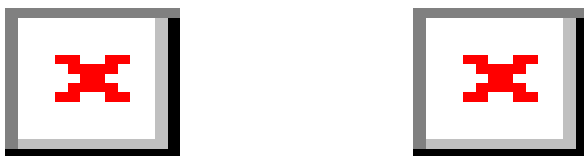

**Figure S5.** BAM images of  $\text{CaCO}_3$  crystallization beneath peptide **2a** at 0.1 mN/m for 1 hour (left) and 2 hours (right).

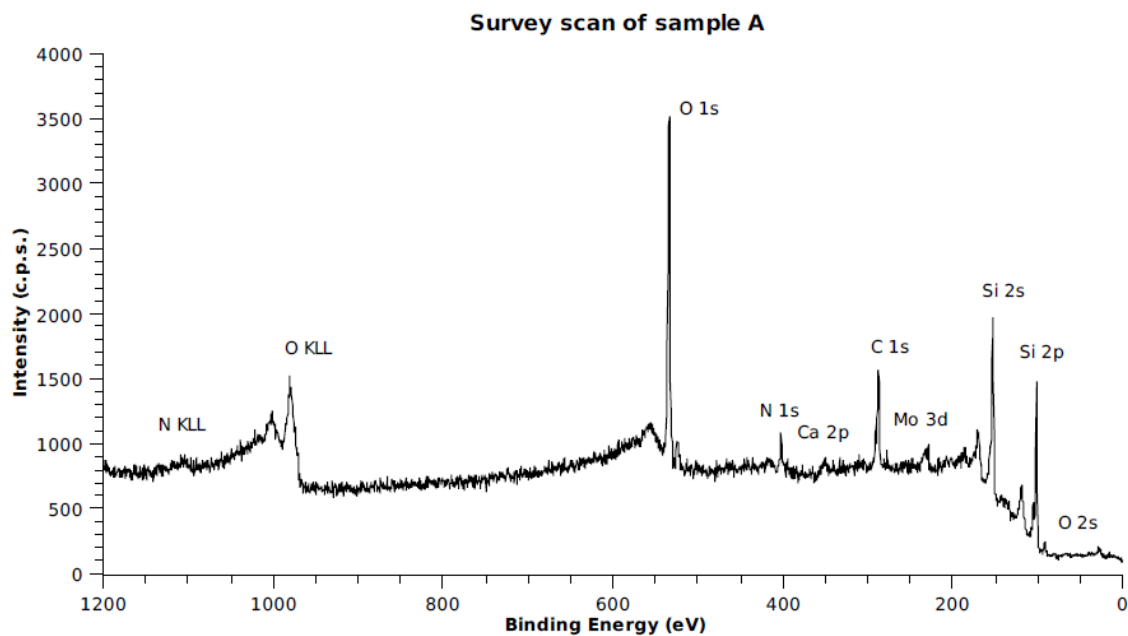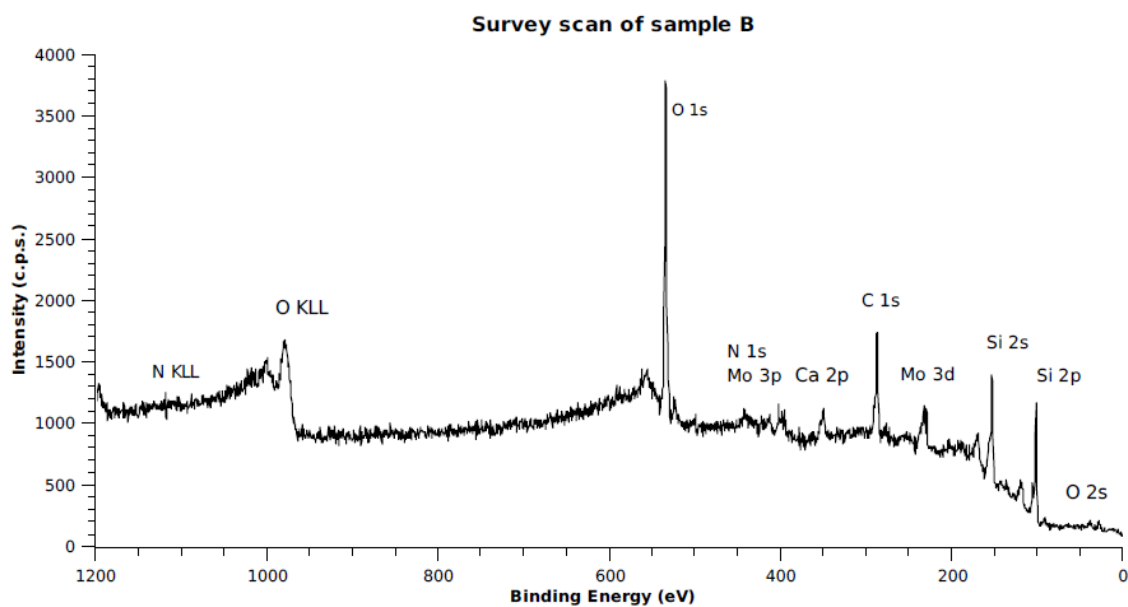

**Figure S6.** XPS survey of peptide **1a** and **1b** monolayer on on an aqueous subphase containing calcium acetate (9mM).
